# Supplementary material
Source: PubMed Central journal article supplement (PMC2478733)
Supplement: 97320630002339S1.pdf [file 97320630002339S1.pdf]

## Supplementary material

| Properties                                              | <i>E. coli</i> GUS                                                                    | <i>Staphylococcus sp.</i> GUS                                                         |
|---------------------------------------------------------|---------------------------------------------------------------------------------------|---------------------------------------------------------------------------------------|
| Number of amino acids                                   | 603                                                                                   | 602                                                                                   |
| Molecular weight (Dalton)                               | 68447.0                                                                               | 68701.3                                                                               |
| Theoretical pI                                          | 5.24                                                                                  | 5.07                                                                                  |
| Total number of negatively charged residues (Asp + Glu) | 80                                                                                    | 90                                                                                    |
| Total number of positively charged residues (Arg + Lys) | 56                                                                                    | 62                                                                                    |
| Molecular formula                                       | C <sub>3068</sub> H <sub>4646</sub> N <sub>834</sub> O <sub>908</sub> S <sub>22</sub> | C <sub>3118</sub> H <sub>4720</sub> N <sub>812</sub> O <sub>921</sub> S <sub>12</sub> |
| Total number of atoms                                   | 9478                                                                                  | 9583                                                                                  |
| Computed instability index                              | 26.68                                                                                 | 26.54                                                                                 |
| Aliphatic index                                         | 77.74                                                                                 | 80.53                                                                                 |

**Table 1:** Predicted physiochemical properties of  $\beta$ -glucuronidases.

| Organism                  | Alpha helix (%) | Beta strand (%) | Random coil (%) |
|---------------------------|-----------------|-----------------|-----------------|
| <i>Escherichia coli</i>   | 21.72           | 31.34           | 46.93           |
| <i>Staphylococcus sp.</i> | 22.26           | 28.24           | 49.50           |

**Table 2:** The composition of secondary structural elements in  $\beta$ -glucuronidases from *E. coli* and *Staphylococcus* is given.
